# Supplementary material for: Application of a two-step approach for mapping ice thickness to various glacier types on Svalbard
Source: Copernicus journal article supplement (doi:10.5194/tc-2017-30), 2017-03-17
Supplement: Supplementary file [file tc-2017-30-AC3-supplement.pdf]

Response to the

**Interactive comment on “Application of a two-step approach for mapping ice thickness to various glacier types on Svalbard”** by Johannes Jakob Fürst et al.

F. Maussion (Referee #2)

fabien.maussion@uibk.ac.at

Received and published: 13 April 2017

*First of all we want to thank the reviewer for constructive comments on our manuscript. All comments have been taken into account and a list of answers and undertaken actions is given below. Answers are indented and in italic type while a **short summarising reply** is provided in italic, bold-face type.*

### **General comments**

In their manuscript, the authors present a new method to estimate the ice thickness of glaciers and ice-caps. They rely on an established theoretical background, but the paper presents innovative ways to deal with limited or inconsistent data input. The study is solid, comprehensive, and I am confident that many readers will find the paper useful for their research. I agree with most (if not all) of the issues raised by D. Brinkerhoff, and there is no point in repeating them here. However, I will modestly try to offer a different perspective, driven by my personal interests (large scale glaciology and reproducible science).

### Generalisation of the method to other glaciers/regions

The authors state two times (in the abstract and in the conclusion) that their method has “data requirements which are comparable to other approaches that have already been applied world-wide”. I have to disagree with this statement, which unnecessarily raises the readers expectations. To my knowledge, we are still far away from a global dataset of surface mass-balance and  $\partial h/\partial t$ . The most promising method to estimate geodetic mass-balance (DEM differencing) is rarely applied to regions larger than a catchment or mountain chain, and the global methods (GRACE, Ice-sat) suffer from considerable drawbacks (coarse spatial resolution and high uncertainties). Therefore, I suggest to remove this statement from the abstract. My understanding of the study is that it presents a way to deal with uncertainties in the boundary conditions and in the observations to which the model is tuned. Most efforts, it seems, are spent into correcting  $\dot{a}$  to avoid singularities and in defining a formal way to propagate observational uncertainties. In the end, I feel like the paper would benefit from a more thorough discussion about the benefits and drawbacks of their method for large scale experiments, i.e. without any observation and/or without an observational dataset for  $\dot{a}$ .

*We agree with the reviewer that reconstruction approaches that are applied world-wide comprise an approximation for unknown input fields as SMB and*

*surface elevation changes. Such a parametersiation is indeed not presented here. So, our approach is not directly transferable worldwide. We therefore rephrased sentences in the abstract and the conclusion. In this way, no expectations on global applicability are raised. Therefore, a discussion on benefits and drawbacks of the presented approach in terms of global application become dispensable.*

**Corrected** by rephrasing sentences in the abstract and conclusion.

#### Structure of the paper

Like D. Brinkerhoff, I notice that the paper could gain in readability. I am however unsure how to proceed. On the one hand, I truly appreciate the authors thoroughness, and I am sure that the interested reader will find most of the information s/he needs to reproduce the steps listed here. On the other hand, the paper is long and sometimes difficult to follow. A change along the lines proposed by D. Brinkerhoff will surely improve the papers readability, but I would refrain from cutting too much text out of the paper: instead, move some details to the appendix or the suppl. material. (take the paragraph about the slope angle threshold for example: a specialist will probably be interested in this information, but a more general audience would rather skip these details).

*We restructured the article according to the suggestions by reviewer #1. The passage on surface slope averaging was removed as we no longer follow another approach to determine flux directions. See answers to reviewer #1*

**Corrected** by re-structuring the article.

#### Case study?

To test a new method, one should rely on the best possible data input for calibration/validation. When looking at the fields in Fig. 02 I can't really imagine that this is the case in Svalbard. It is too late for this study, but in the future I would suggest to look at more appropriate benchmark glaciers (right at our doorstep?), where data denial experiments can be realised much more easily and with much more confidence in the boundary conditions.

*We understand the reviewers concern on the input data quality on Svalbard. In ITMIX phase 2, we anticipate test glaciers for which reliable input fields will be made available in the near future. Once available, the ITMIX setup will certainly serve as a standardised benchmark for model validation.*

**No action undertaken.**

## Specific comments

**P2, L2** “**virtually complete coverage**” none of the cited studies (apart maybe from Paul et al, which is rather a methodological review paper) states that surface elevation change products have reached complete coverage. This is related to my general comment: the method presented in this paper is promising, but still belongs to the demanding ones in terms of data availability.

*The specific passage, the reviewer points at, was misleading as we tried to condense to many aspects. We therefore reformulated the respective sentences giving more details and trying to be more specific.*

**Corrected** accordingly.

**P2 L27** “**apparent flux divergence**” I also think that this new terminology makes no sense. One can argue about whether apparent mass-balance is the best term or not, but “apparent flux divergence” is definitely more confusing than helping.

*Reverted terminology back to ‘apparent mass balance’. For details see answers to reviewer #1.*

**Corrected.** We now use ‘apparent mass balance’.

**Figure 5** Obviously, both the observations and the ice divides (zero flux locations) are way too visible on the bedrock topography. This calls for a more constrained tuning, either by changing the way B is allowed to vary or by changing the way the model is dealing with small slopes?

*The slope definition was changed in response to a comment from reviewer #1. This new definition will partially accommodate the slope problem. We do not see a problem with having thickness measurements imprinted in our reconstructed field. If these should be not consistent or show too high spatial variability, data pre-selection or a-priori homogenisation could be anticipated. We do not see the necessity for this here. We refrain from the suggestion to put limits on the tuning parameter B, as it accommodates for uncertainties and discrepancies in the input data as well as assumption in the approach. Therefore limits are hard to derive and they are not necessarily encountered near the divide. The slope threshold is another adjustable parameter but it is already chosen rather small as compared to other reconstruction approaches.*

**Adjusted slope computation.**

**Figure 8** I understand the reason for using normalized values here, but from a volume estimation perspective (e.g. sea level rise), other metrics are much more important: bias and absolute error (i.e. small relative errors for large thickness values can be more relevant than large relative errors for small thickness values). Have you considered looking at absolute values, too?

*This comment was very helpful because this figure changed often during the writing process. In its final form, it was actually again possible to present absolute values.*

**Corrected.**

#### **Editorial comments**

**P3 L15** dot is missing

**Removed.**

**Fig. 02** intuitively, I associate blue values with positive mass-balance / surface change and red with the opposite. Consider reversing your colortable.

**Corrected** by *inverting colourmap.*

**All figures** consider damping the topographical shading, which is currently very strong without a clear added value.

**Corrected** by *removing transparency from most figures. Only exception is the presentation of the second-step results.*

**All figures** consider using another colormap. Rainbow (or “jet” in python) is now considered by many as being misleading (e.g. <https://www.climate-lab-book.ac.uk/2014/end-of-the-rainbow/> and many further refs online)

**Corrected** by *changing rainbow colourbar to another colourbar provided by ColorBrewer2.0.*
